# Supplementary material
Source: PubMed Central journal article supplement (PMC6187639)

# SUPPLEMENTARY INFORMATION

## Double genetic disruption of lactate dehydrogenases A and B is required to ablate the ‘Warburg effect’ restricting tumor growth to oxidative metabolism

Maša Ždravlević<sup>1#</sup>, Almut Brand<sup>1,2#</sup>, Lorenza Di Ianni<sup>1#</sup>, Katja Dettmer<sup>3</sup>, Jörg Reinders<sup>3</sup>, Katrin Singer<sup>2</sup>, Katrin Peter<sup>2,4</sup>, Annette Schnell<sup>2</sup>, Christina Bruss<sup>2</sup>, Sonja-Maria Decking<sup>2</sup>, Gudrun Koehl<sup>5</sup>, Blanca Felipe-Abrio<sup>1</sup>, Jérôme Durivault<sup>8</sup>, Pascale Bayer<sup>6</sup>, Marie Evangelista<sup>7</sup>, Thomas O’Brien<sup>7</sup>, Peter J. Oefner<sup>3</sup>, Kathrin Renner<sup>2,4, #</sup>, Jacques Pouyssegur<sup>1,8,#,\*</sup>, Marina Kreutz<sup>2,4,#,\*</sup>

<sup>1</sup>Université Côte d’Azur, IRCAN, CNRS, Inserm, Centre A. Lacassagne, 06189, Nice, France.

<sup>2</sup>Department of Internal Medicine III, University Hospital Regensburg, 93053 Regensburg, Germany.

<sup>3</sup>Institute of Functional Genomics, University of Regensburg, 93053 Regensburg, Germany.

<sup>4</sup>Center for Interventional Immunology, University of Regensburg, 93053 Regensburg, Germany.

<sup>5</sup>Department of Surgery, University Hospital Regensburg, 93053 Regensburg, Germany.

<sup>6</sup>Université Côte d’Azur, University Hospital Pasteur, Clinical Chemistry Laboratory, Nice, France.

<sup>7</sup>Discovery and Translational Oncology, Genentech, South San Francisco, California, USA.

<sup>8</sup>Medical Biology Department, Centre Scientifique de Monaco (CSM), Monaco.

## Figures Legends

**Figure S1**

**Figure S2**

**Figure S3**

### Supplementary figures legends

**Figure S1: Mitochondrial function is altered in *LDHA/B*-DKO cells.** Basal respiration (**A, D**), maximal respiration (**B, E**) and oxygen consumption related to ATP production (**C, F**) were analyzed by means of an Oroboros oxygraph in LS174T (**A-C**) and B16 (**D-F**) WT and *LDH*-KO cells. Mitochondrial respiration was determined by high-resolution respirometry. Cells were suspended at a concentration of approximately  $0.5 \times 10^6$  cells/ml in culture medium and a total of 2.1 ml was added to the each chamber. Basal respiration (**A, D**) was determined after a stabilization phase of 15 min. Maximum capacity of the electron transfer system (ETS, **B, E**) was determined after stepwise uncoupling with FCCP in the presence of oligomycin. Oxygen consumption related to ATP production ( $O_2$ -ATP, **C, F**) was calculated as the difference of basal respiration and LEAK respiration (oligomycin-inhibited respiration). Shown are single values and the median of at least three independent experiments.. \*  $p < 0.05$ , \*\*  $p < 0.002$ , \*\*\*  $p < 0.0008$ ,

**Figure S2: Impact of *LDHA/B*-knock-out on mitochondrial content.** Median fluorescence intensity of LS174T (**A**) and B16 cells (**D**) labeled with Mitotracker probe was analyzed by flow cytometry. mtDNA/nDNA ratio content of WT and *LDH*-KO LS174T (**B**) and B16 (**E**) cells evaluated by qPCR. The mean  $\pm$  S.E.M. is representative of four independent experiments performed in duplicate. \*  $p < 0.03$ , \*\*  $p < 0.003$ . COXIV and cytochrome c levels in LS174T (**C**) and COXIV, cytochrome c and ATP8 protein levels in B16 cells (**F**), as revealed by proteomic analysis.

**Figure S3: *LDHA/B*-DKOs show an increase in the isotopologues of alanine.** (**A**) Labeling pattern for  $^{13}C_6$ -glucose tracing. Blue circles represent a  $^{13}C$  atom, black a  $^{12}C$ . Flux with one round through the TCA is shown. For alanine (pyruvate) only fully labeled products are expected, but the *LDHA/B*-DKOs show an increase in the m+1 and m+2 isotopologues of alanine. (**B**) Labeling pattern for  $^{13}C_5$ -glutamine tracing. Blue circles represent a  $^{13}C$  atom, black a  $^{12}C$ . Flux with one round through the TCA is shown. For alanine (pyruvate) no labeled products are expected, but the *LDHA/B*-DKOs show an increase in the m+3 (and m+1 and m+2) isotopologues of alanine.

**Fig.S1**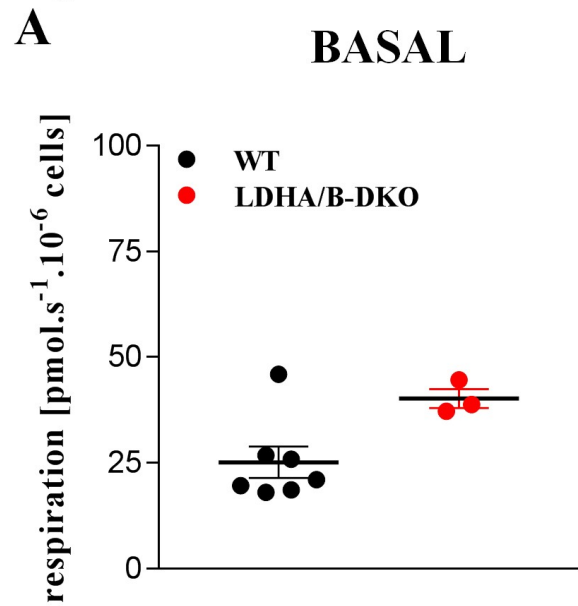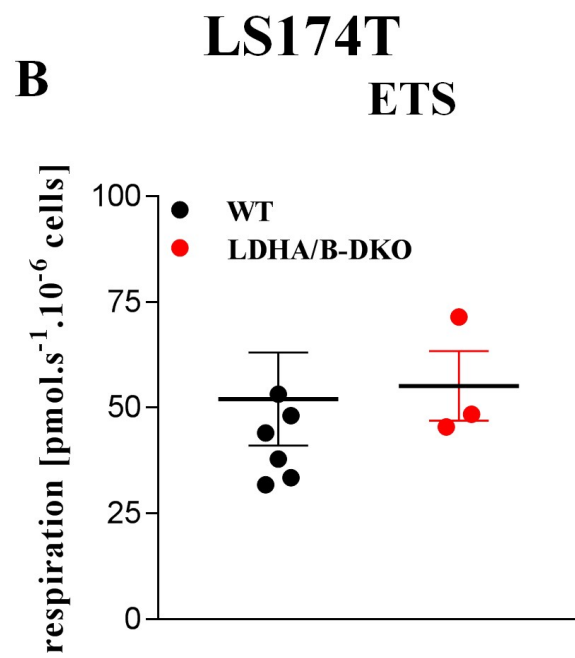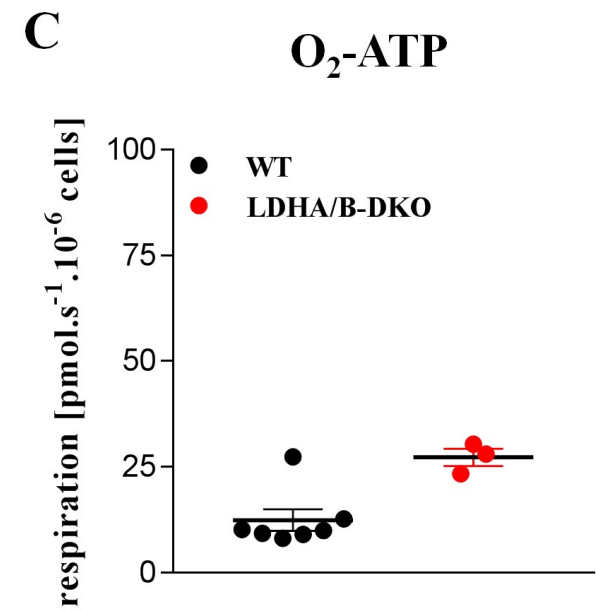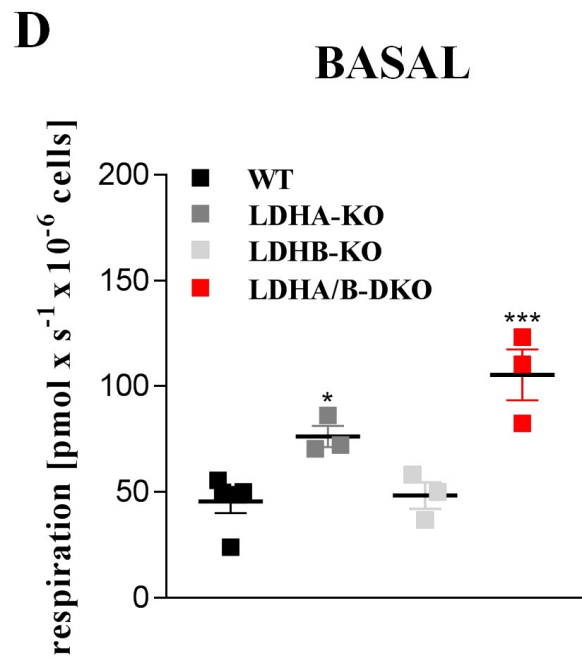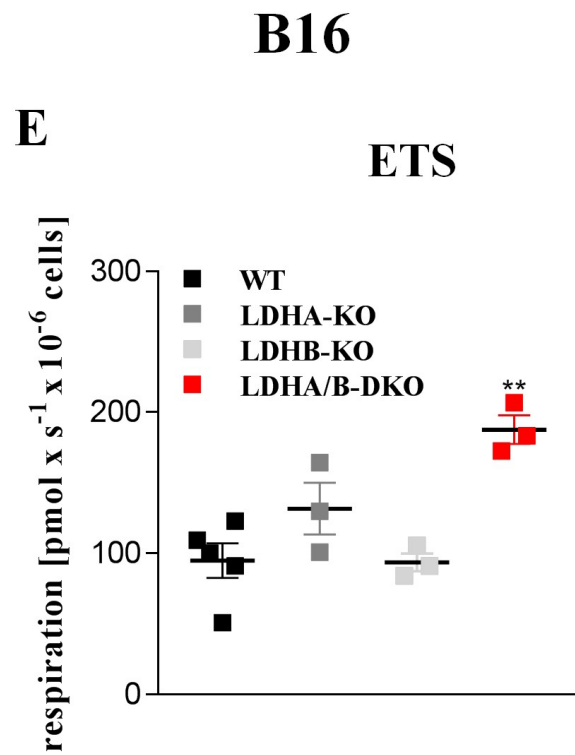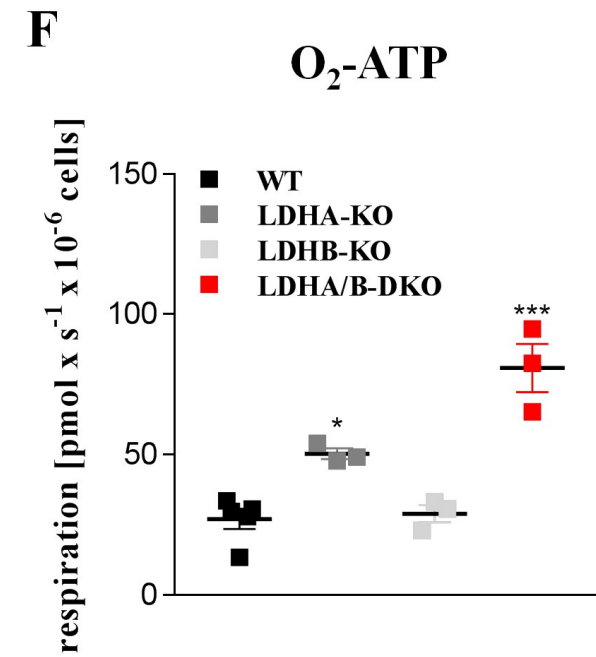

**Fig S2****A**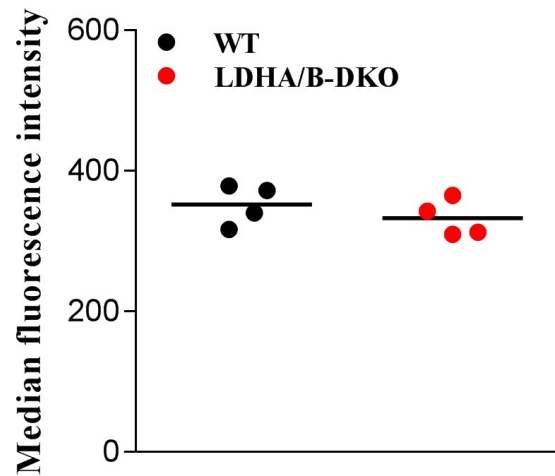**B**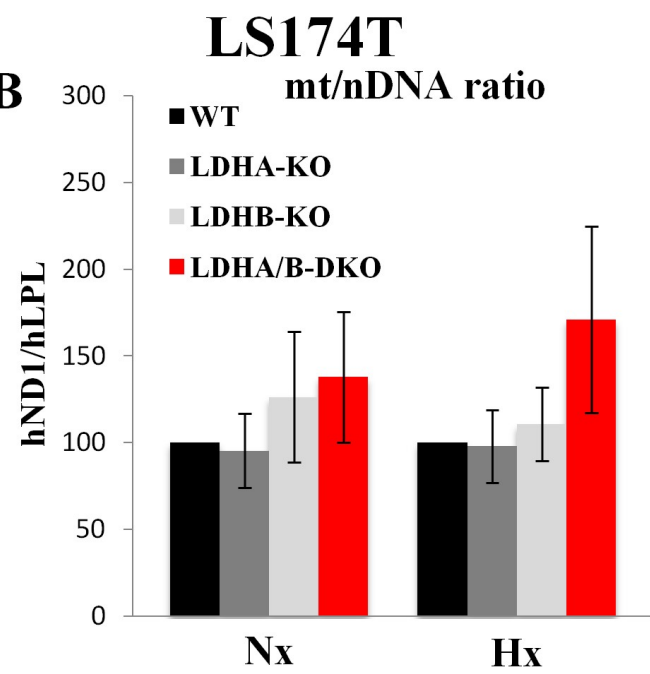**C**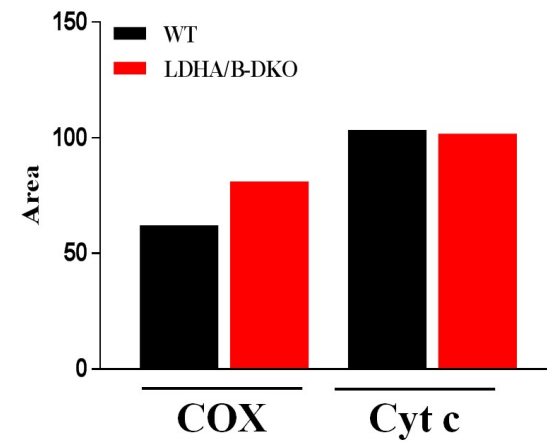**B16****D**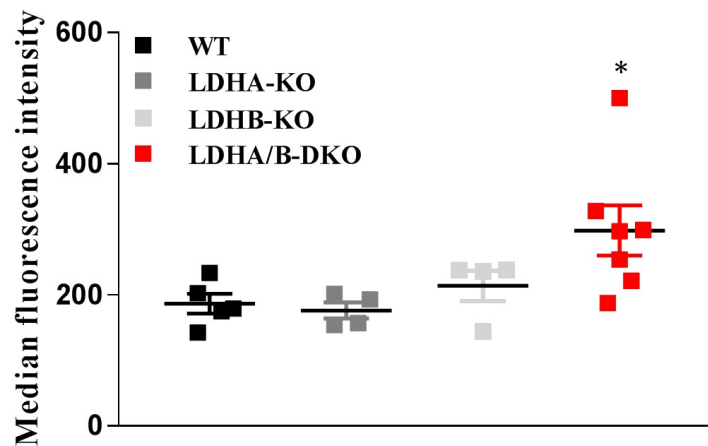**E**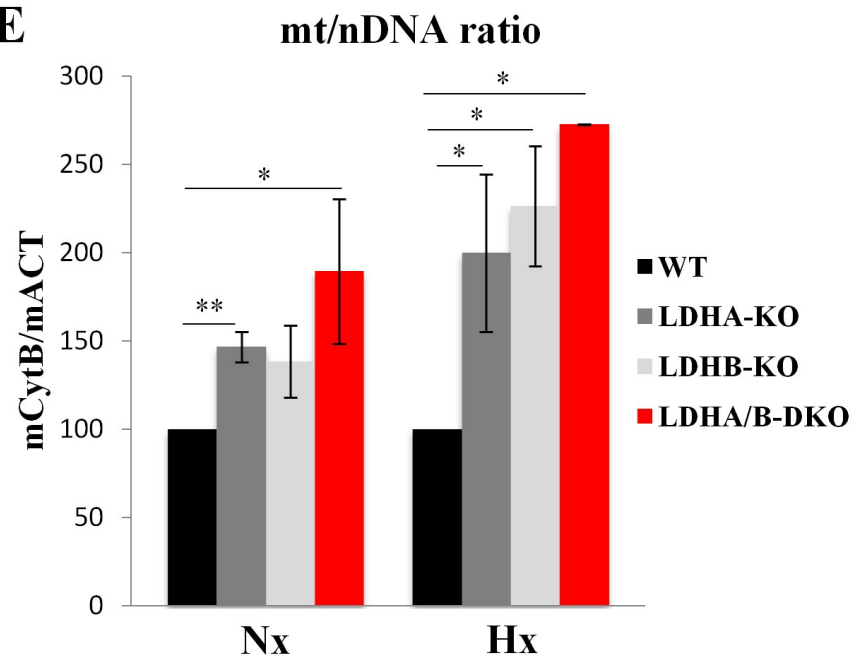

**Fig S3 A**

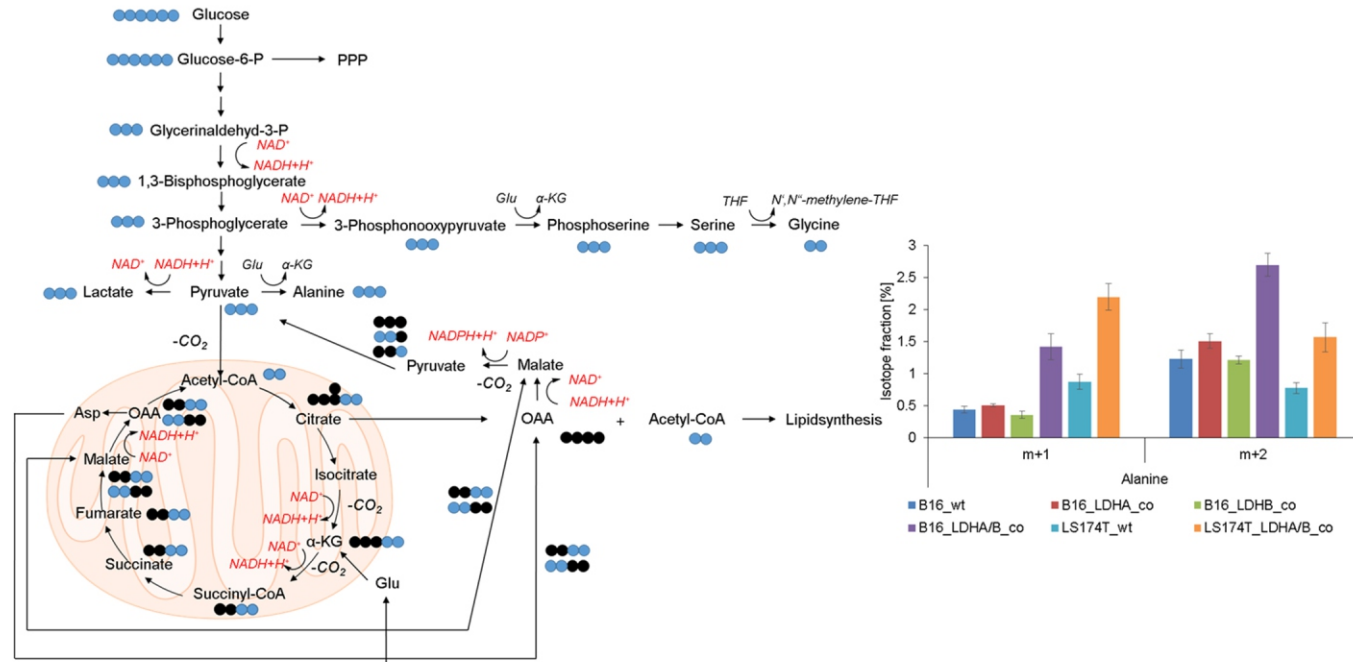

**B**

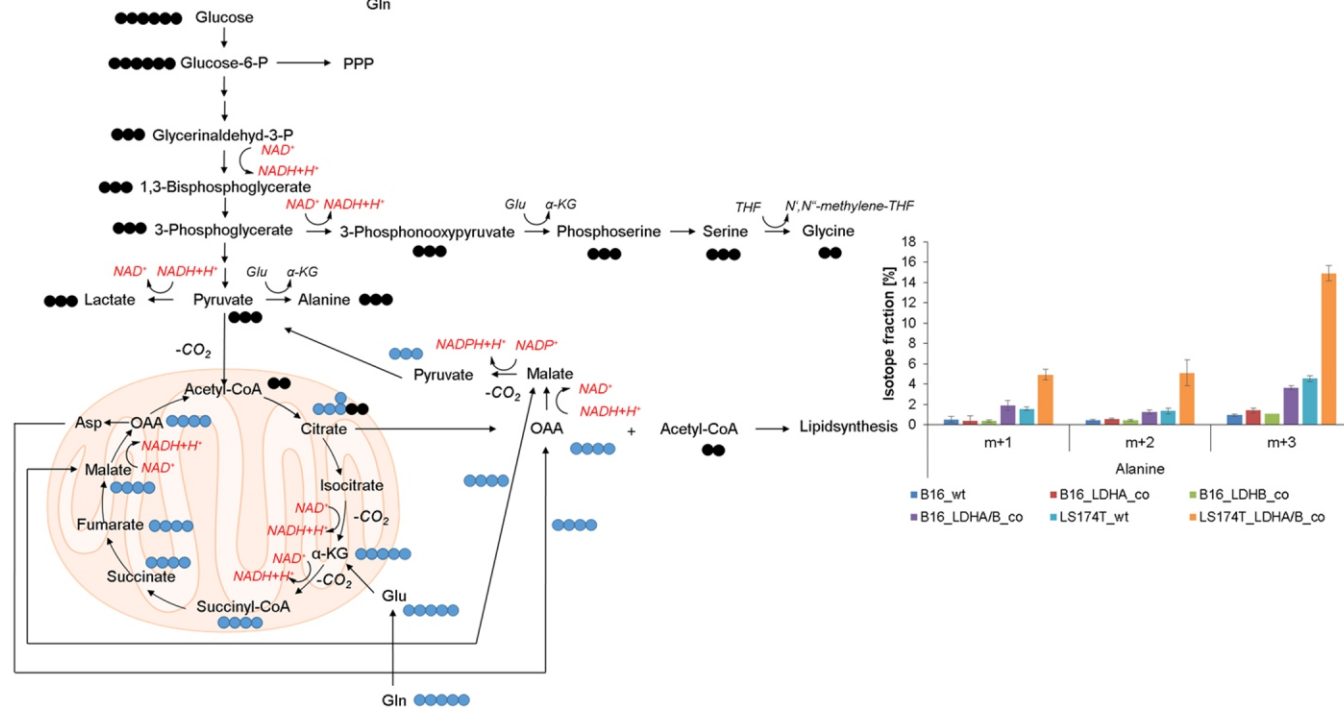

Supplement: supp_RA118.004180_138421_2_supp_185621_pdtmpm.pdf [file supp_RA118.004180_138421_2_supp_185621_pdtmpm.pdf]
